# Supplementary material for: Nutritional Status Assessed with Objective Data Assessment Correlates with a High-Risk Foot in Patients with Type 2 Diabetes
Source: MDPI journal article supplement (doi:10.3390/jcm11051314), 2022-02-27
Supplement: s1 [file s1]

**Supplemental Table S1. (a).** Multivariate-adjusted ORs (95% CI) for high-risk diabetic foot assessed with IWGDF in patients taking statin. **(b).** Multivariate-adjusted ORs (95% CI) for high-risk diabetic foot assessed with IWGDF in patients not taking statin.

| <b>(a)</b>                  |                  |          |                  |          |
|-----------------------------|------------------|----------|------------------|----------|
|                             | years <75        |          | years ≥75        |          |
|                             | OR (95%CI)       | <i>P</i> | OR (95%CI)       | <i>P</i> |
| Age                         | 1.03 (0.99–1.08) | 0.140    | 1.26 (1.00–1.69) | 0.048    |
| Male                        | 2.52 (1.11–6.00) | 0.027    | 3.74 (0.52–45.2) | 0.198    |
| Duration of type 2 diabetes | 1.04 (0.99–1.08) | 0.106    | 1.07 (0.98–1.18) | 0.160    |
| BMI                         | 1.03 (0.94–1.13) | 0.508    | 1.10 (0.80–1.55) | 0.558    |
| Hemoglobin A1c              | 1.15 (0.82–1.65) | 0.418    | 0.81 (0.26–2.44) | 0.709    |
| Creatine                    | 1.01 (1.00–1.03) | 0.044    | 1.00 (0.97–1.05) | 0.858    |
| Hypertension                | 1.16 (0.45–3.07) | 0.753    | 1.12 (0.16–8.40) | 0.905    |
| Current smoking             | 1.83 (0.56–5.89) | 0.306    | 2.37 (0.03–30.8) | 0.680    |
| CONUT                       | 1.02 (0.82–1.26) | 0.866    | 1.72 (1.03–3.26) | 0.034    |
| <b>(b)</b>                  |                  |          |                  |          |
|                             | years <75        |          | years ≥75        |          |
|                             | OR (95%CI)       | <i>P</i> | OR (95%CI)       | <i>P</i> |
| Age                         | 1.06 (1.02–1.11) | 0.006    | 1.21 (1.00–1.52) | 0.046    |
| Male                        | 1.34 (0.59–3.04) | 0.480    | 3.17 (0.56–25.1) | 0.196    |
| Duration of type 2 diabetes | 1.00 (0.97–1.04) | 0.716    | 1.07 (1.00–1.16) | 0.038    |
| BMI                         | 0.95 (0.88–1.03) | 0.246    | 1.08 (0.86–1.39) | 0.509    |

|                 |                  |       |                  |       |
|-----------------|------------------|-------|------------------|-------|
| Hemoglobin A1c  | 1.37 (0.98–1.92) | 0.066 | 0.84 (0.33–2.03) | 0.697 |
| Creatine        | 1.02 (1.01–1.04) | 0.001 | 1.00 (0.97–1.03) | 0.966 |
| Hypertension    | 1.73 (0.77–3.97) | 0.181 | 2.28 (0.43–12.5) | 0.329 |
| Current smoking | 1.85 (0.51–6.49) | 0.339 | 2.85 (0.10–9.58) | 0.552 |
| CONUT           | 0.90 (0.74–1.10) | 0.326 | 1.64 (1.03–2.87) | 0.036 |

---

OR, odds ratio; CI, confidence interval; IWGDF, International Working Group on the Diabetic Foot; BMI, body mass index; CONUT, controlling nutritional status.
